# Supplementary material for: Whole-Genome Sequencing to Identify Missed Rifampicin and Isoniazid Resistance Among Tuberculosis Isolates—Chennai, India, 2013–2016
Source: Front Microbiol. 2021 Nov 22;12:720436. doi: 10.3389/fmicb.2021.720436 (PMC8645853; doi:10.3389/fmicb.2021.720436)
Supplement: Supplementary file 4 [file Table_4.xlsx]

## Sheet: Sheet1
Supplemental Table 4: Genetic mutations for different drug resistance detected by WGS and their phenotypic detection by MGIT
Gene	Mutation	Phenotypically Resistant (n)	Phenotypically Sensitive (n)	Total
Ethambutol
embB	F285L	0	1	1
	M306I	4	14	18
	M306L	1	4	5
	M306V	9	5	14
	D354A	2	1	3
	L402V	1	8	9
	G406A	0	1	1
	G406D	0	3	3
	G406S	0	3	3
	Q497K	0	1	1
	Q497R	2	2	4
	H1002R	0	1	1
	D1024N	0	3	3
	Q853P; T1082A	0	1	1
	G406D;Q853P;T1082A	0	2	2
embC	A774S	1	1	2
embA	C-16T	1	0	1
	G-43C	0	1	1
	C-12T; embB E405D	0	1	1
	No mutation	1	91	92
Pyrazinamide
pncA	A146P	1	0	1
	C14R	1	0	1
	C72Y	1	0	1
	D12G	1	0	1
	F81S	1	0	1
	F94L	1	0	1
	G108R	1	0	1
	G17D	1	0	1
	H51R	1	0	1
	K96R	1	0	1
	L182S	1	0	1
	L27P	1	0	1
	L4W	1	0	1
	M175V	1	0	1
	P54S	1	0	1
	Q10P	2	0	2
	Q10R	1	0	1
	T-7C & S59P	1	0	1
	T135P	1	0	1
	T61P	1	0	1
	V180F	3	0	3
	V21G	1	0	1
	Y103H	1	0	1
	A-11G	0	1	1
	H71Y	0	1	1
	P69R	0	1	1
	A-11G & T76P	0	1	1
	No mutation	33	103	136
Streptomycin
rrs	A1401G	1	0	1
	A514C	2	0	2
	C517T	2	0	2
rpsL	K43R	18	0	18
	K88R	3	0	3
gid	E103*	1	0	1
	H48N	1	0	1
	L79S	1	0	1
	L91P	1	0	1
	V188G	1	0	1
	A138V	0	2	2
	A205E & P93L	0	1	1
	P93L	0	1	1
	Q125*	0	2	2
	R47W	0	1	1
	S149R	0	2	2
	No mutation	18	108	126
Aminoglycosides
rrs	A1401G	1	0	1
	A514C	0	2	2
	C517T	0	2	2
	No mutation	2	159	161
Fluoroquinolones
gyrA	A90V	7	0	7
	D94A	1	0	1
	D94G	6	0	6
	No mutation	2	150	152
Ethionamide
inhA	C-15T	12	5	17
	C-15T & I21T	1	0	1
	C-15T & S94A	1	0	1
	G-17T	1	1	2
	I194T	1	0	1
	I21T	1	0	1
	T-8C	3	0	3
	C-15T & I194T	0	1	1
ethA	G413D	1	3	4
	No Mutation	26	109	135
Note: *-Stop codon; Aminoglycosides- Amikacin, kanamycin and capreomycin; Fluoroquinolones - Ofloxacin, levofloxacin and moxifloxacin.
